# Supplementary material for: Cathepsin in Alzheimer's Disease, Parkinson's Disease and Dementia with Lewy Bodies: Mendelian Randomization Study
Source: Research Square preprint supplement (doi:10.21203/rs.3.rs-3977553/v1), 2024-02-28
Supplement: Supplementary file 1 [file 8ad4bd1d0c0de29f732b6544.xlsx]

## Sheet: Sheet1
Table 1 Causal association of cathepsins on AD, PD, and DLB univariable Mendelian randomization analysis.
			Inverse variance weighted		MR-Egger		Weighted median
Exposures	Outcome	SNPs	OR (95%CI)	p_value	OR (95%CI)	p_value	OR (95%CI)	p_value
Cathepsin B
	AD	15	1.005（0.976-1.036）	0.735	0.958（0.899-1.022）	0.215	0.999（0.962-1.038）	0.959
	PD	15	0.890（0.831-0.954）	0.0009	0.801（0.685-0.936）	0.0154	0.869（0.791-0.954）	0.003
	LBD	15	1.043（0.845-1.289）	0.692853	1.147（0.692-1.900）	0.60342	1.007（0.845-1.200）	0.937
Cathepsin E
	AD	10	0.997（0.936-1.062）	0.92	1.008（0.873-1.162）	0.92	1.057（0.987-1.131）	0.114
	PD	11	0.973（0.862-1.098）	0.656	0.920（0.685-1.234）	0.59	0.989（0.838-1.167）	0.897
	LBD	9	0.940（0.773-1.144）	0.53788	1.1972（0.773-1.855）	0.447119	0.975（0.751-1.266）	0.85
Cathepsin F
	AD	13	1.028（0.988-1.068）	0.17	1.005（0.909-1.111）	0.924	0.998（0.953-1.045）	0.923
	PD	11	0.912（0.810-1.027）	0.129	0.855（0.595-1.228）	0.418	0.883（0.788-0.990）	0.032
	LBD	11	0.985（0.847-1.147）	0.849725	0.941（0.629-1.410）	0.776772	1.116（0.925-1.347）	0.251
Cathepsin G
	AD	13	0.989（0.951-1.027）	0.561	0.973（0.899-1.054）	0.523	1.004（0.954-1.056）	0.881
	PD	12	1.043（0.893-1.217）	0.5979	0.853（0.614-1.184）	0.3638	0.960（0.818-1.125）	0.612
	LBD	10	1.016（0.839-1.230）	0.8737	0.892（0.608-1.310）	0.5768	0.979（0.760-1.260）	0.869
Cathepsin H
	AD	11	1.042（1.014-1.070）	0.003	1.058（1.020-1.098）	0.015	1.050（1.026-1.076）	4.098×10-5
	PD	11	1.008（0.961-1.058）	0.7378	1.028（0.962-1.099）	0.43225	1.020（0.968-1.074）	0.46
	LBD	11	1.125（1.028-1.233）	0.010793	1.150（1.013-1.306）	0.0590214	1.133（1.019-1.260）	0.021
Cathepsin L2
	AD	11	1.005（0.951-1.061）	0.868	0.875（0.799-0.958）	0.018	1.010（0.952-1.072）	0.737
	PD	12	0.930（0.837-1.032）	0.172	0.930（0.718-1.204）	0.5934	0.924（0.798-1.070）	0.291
	LBD	11	0.961（0.808-1.144）	0.6573	1.215（0.824-1.791）	0.351083	1.024（0.816-1.285）	0.839
CathepsinO
	AD	12	0.996（0.939-1.057）	0.894	0.916（0.811-1.033）	0.184	0.988（0.932-1.047）	0.68
	PD	9	1.069（0.941-1.213）	0.3065	0.967（0.702-1.334）	0.845566	1.063（0.901-1.253）	0.47
	LBD	9	1.133（0.932-1.378）	0.209595	1.172（0.799-1.718）	0.442728	1.102（0.858-1.417）	0.447
CathepsinS
	AD	23	1.012（0.988-1.037）	0.327	0.999（0.959-1.041）	0.958	1.008（0.976-1.041）	0.626
	PD	23	0.995（0.944-1.049）	0.8448	0.979（0.900-1.064）	0.618696	0.968（0.905-1.036）	0.347
	LBD	22	0.976（0.881-1.081）	0.64357	1.044（0.878-1.242）	0.632217	1.014（0.882-1.165）	0.845
CathepsinZ
	AD	13	0.987（0.951-1.024）	0.494	0.977（0.918-1.040）	0.479	0.975（0.940-1.011）	0.176
	PD	13	0.939（0.877-1.006）	0.0727	0.953（0.850-1.067）	0.4205	0.912（0.831-1.001）	0.052
	LBD	12	1.110（0.963-1.280）	0.150641	1.034（0.767-1.392）	0.831758	1.119（0.926-1.352）	0.244
